# Supplementary material
Source: HighWire-hosted journal article supplement (https://erj.ersjournals.com/content/60/6/2200459)
Supplement: inline-supplementary-material-2 [file inline-supplementary-material-2.pdf]

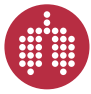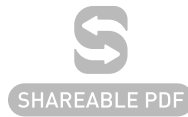

# A biomarker assay to risk-stratify patients with symptoms of respiratory tract infection

Shahid Husain<sup>1,2,3</sup>, Andrew T. Sage<sup>2,3</sup>, Lorenzo del Sorbo<sup>2,3,4</sup>, Marcelo Cypel<sup>2,3,5,6</sup>, Tereza Martinu<sup>2,3,5,7</sup>, Stephen C. Juvet<sup>2,3,5,7</sup>, Andrea Mariscal<sup>2,3</sup>, Julie Wright<sup>8</sup>, Bonnie T. Chao<sup>2</sup>, Alaa A. Shamandy<sup>9,10</sup>, S. Hossein Mousavi<sup>2</sup>, Jin Ma<sup>11</sup>, Bo Wang<sup>9,10,12,13</sup>, Jerome Valero<sup>2,3</sup>, Mingyao Liu<sup>2,3,5</sup>, Megan Landes<sup>14,15</sup>, Sharaniyaa Balachandran<sup>2,3</sup>, Kimberley Hudson<sup>2,3</sup>, Michelle Ngai<sup>8</sup>, Marialessia Capuano<sup>16</sup>, Maria Gelardi<sup>16</sup>, Enrico Lupia<sup>16</sup>, Daniel R. Marinowic<sup>17</sup>, Frederico O. Friedrich<sup>17</sup>, Carine R.R. Schmitz<sup>18</sup>, Leticia S.M. dos Santos<sup>19</sup>, Florencia M. Barbe-Tuana<sup>19</sup>, Marcus H. Jones<sup>17</sup>, Kevin C. Kain<sup>8</sup>, Tony Mazzulli<sup>20</sup>, Sam Sabbah<sup>14,21</sup> and Shaf Keshavjee<sup>2,3,5,6</sup>

<sup>1</sup>Division of Infectious Diseases, Toronto General Hospital, University Health Network, University of Toronto, Toronto, ON, Canada. <sup>2</sup>Toronto Lung Transplant Program and Latner Thoracic Research Laboratories, Toronto General Hospital Research Institute, University Health Network, University of Toronto, Toronto, ON, Canada. <sup>3</sup>Ajmera Transplant Centre, University Health Network, University of Toronto, Toronto, ON, Canada. <sup>4</sup>Interdepartmental Division of Critical Care Medicine, Medical and Surgical Intensive Care Unit, University Health Network, University of Toronto, Toronto, ON, Canada. <sup>5</sup>Institute of Medical Science, University of Toronto, Toronto, ON, Canada. <sup>6</sup>Division of Thoracic Surgery, Department of Surgery, University of Toronto, Toronto, ON, Canada. <sup>7</sup>Division of Respiriology, Department of Medicine, University of Toronto, Toronto, ON, Canada. <sup>8</sup>Tropical Disease Unit, Department of Medicine, University of Toronto, Sandra Rotman Centre for Global Health, University Health Network, Toronto General Hospital, Toronto, ON, Canada. <sup>9</sup>Department of Computer Science, University of Toronto, Toronto, ON, Canada. <sup>10</sup>Peter Munk Cardiac Centre, University Health Network, Toronto, ON, Canada. <sup>11</sup>Biostatistics Research Unit, University Health Network, Toronto, ON, Canada. <sup>12</sup>Department of Laboratory Medicine and Pathobiology, University of Toronto, Toronto, ON, Canada. <sup>13</sup>Vector Institute, Toronto, ON, Canada. <sup>14</sup>Department of Emergency Medicine, University Health Network, Toronto, ON, Canada. <sup>15</sup>Division of Emergency Medicine, Department of Family and Community Medicine, University of Toronto, Toronto, ON, Canada. <sup>16</sup>Division of Emergency Medicine and High Dependency Unit, Città della Salute e della Scienza di Torino Hospital-Molinette Site, Department of Medical Sciences, University of Turin, Turin, Italy. <sup>17</sup>School of Medicine, Pontifical Catholic University of Rio Grande do Sul, Porto Alegre, Brazil. <sup>18</sup>Biochemistry, Federal University of Rio Grande do Sul, Porto Alegre, Brazil. <sup>19</sup>School of Health, Sciences and Life, Pontifical Catholic University of Rio Grande do Sul, Porto Alegre, Brazil. <sup>20</sup>Department of Microbiology, Mount Sinai Hospital, Toronto, ON, Canada. <sup>21</sup>Division of Emergency Medicine, Department of Medicine, University of Toronto, Toronto, ON, Canada.

Corresponding author: Shaf Keshavjee ([shaf.keshavjee@uhn.ca](mailto:shaf.keshavjee@uhn.ca))

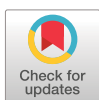

Shareable abstract (@ERSpublications)

The RALI-Dx assay is a biomarker-based approach to emergency department triage for patients with respiratory illness and is superior to conventional strategies. This diagnostic test will help to optimise the utilisation of scarce healthcare resources. <https://bit.ly/3PVjnYp>

**Cite this article as:** Husain S, Sage AT, del Sorbo L, *et al.* A biomarker assay to risk-stratify patients with symptoms of respiratory tract infection. *Eur Respir J* 2022; 60: 2200459 [DOI: 10.1183/13993003.00459-2022].

This single-page version can be shared freely online.

## Abstract

**Background** Patients who present to an emergency department (ED) with respiratory symptoms are often conservatively triaged in favour of hospitalisation. We sought to determine if an inflammatory biomarker panel that identifies the host response better predicts hospitalisation in order to improve the precision of clinical decision making in the ED.

**Methods** From April 2020 to March 2021, plasma samples of 641 patients with symptoms of respiratory illness were collected from EDs in an international multicentre study: Canada (n=310), Italy (n=131) and Brazil (n=200). Patients were followed prospectively for 28 days. Subgroup analysis was conducted on confirmed coronavirus disease 2019 (COVID-19) patients (n=245). An inflammatory profile was determined using a rapid, 50-min, biomarker panel (RALI-Dx (Rapid Acute Lung Injury Diagnostic)), which measures interleukin (IL)-6, IL-8, IL-10, soluble tumour necrosis factor receptor 1 (sTNFR1) and soluble triggering receptor expressed on myeloid cells 1 (sTREM1).

Copyright ©The authors 2022.

This version is distributed under the terms of the Creative Commons Attribution Non-Commercial Licence 4.0. For commercial reproduction rights and permissions contact [permissions@ersnet.org](mailto:permissions@ersnet.org)

This article has an editorial commentary:

<https://doi.org/10.1183/13993003.01808-2022>

Received: 8 March 2022  
Accepted: 25 July 2022

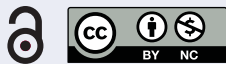

**Results** RALI-Dx biomarkers were significantly elevated in patients who required hospitalisation across all three sites. A machine learning algorithm that was applied to predict hospitalisation using RALI-Dx biomarkers had a mean $\pm$ SD area under the receiver operating characteristic curve of 76 $\pm$ 6% (Canada), 84 $\pm$ 4% (Italy) and 86 $\pm$ 3% (Brazil). Model performance was 82 $\pm$ 3% for COVID-19 patients and 87 $\pm$ 7% for patients with a confirmed pneumonia diagnosis.

**Conclusions** The rapid diagnostic biomarker panel accurately identified the need for inpatient care in patients presenting with respiratory symptoms, including COVID-19. The RALI-Dx test is broadly and easily applicable across many jurisdictions, and represents an important diagnostic adjunct to advance ED decision-making protocols.
